# Supplementary material for: Original oxo-centered bismuth oxo-arsenates; critical effect of PO4for AsO4substitution
Source: Royal Society of Chemistry journal article supplement (doi:10.1039/c6ce02466a), 2016-12-22

## checkCIF/PLATON report

You have not supplied any structure factors. As a result the full set of tests cannot be run.

THIS REPORT IS FOR GUIDANCE ONLY. IF USED AS PART OF A REVIEW PROCEDURE FOR PUBLICATION, IT SHOULD NOT REPLACE THE EXPERTISE OF AN EXPERIENCED CRYSTALLOGRAPHIC REFEREE.

No syntax errors found.      CIF dictionary      Interpreting this report

### Datablock: I

---

Bond precision:    P- O = 0.0307 Å                      Wavelength=0.71073

Cell:                      a=5.6344(2)              b=6.9617(2)              c=19.4034(6)  
                                alpha=90              beta=90              gamma=90  
Temperature:              293 K

|                        | Calculated         | Reported                 |
|------------------------|--------------------|--------------------------|
| Volume                 | 761.10(4)          | 761.10(4)                |
| Space group            | P 21 2 21          | P 21 2 21                |
| Hall group             | P 2ac 2ac          | P 2x <sup>ac</sup> ;2y;2 |
| Moiety formula         | Bi11.37 Cd2 O32 P6 | ?                        |
| Sum formula            | Bi11.37 Cd2 O32 P6 | Bi2.843 Cd0.5 O8 P1.5    |
| Mr                     | 3298.74            | 824.80                   |
| Dx,g cm <sup>-3</sup>  | 7.197              | 7.198                    |
| Z                      | 1                  | 4                        |
| Mu (mm <sup>-1</sup> ) | 67.253             | 67.265                   |
| F000                   | 1385.7             | 1374.0                   |
| F000'                  | 1343.16            |                          |
| h,k,lmax               | 10,12,35           | 9,11,32                  |
| Nref                   | 4688[ 2697]        | 2183                     |
| Tmin,Tmax              | 0.025,0.068        | 0.216,0.745              |
| Tmin'                  | 0.000              |                          |

Correction method= # Reported T Limits: Tmin=0.216 Tmax=0.745  
AbsCorr = MULTI-SCAN

Data completeness= 0.81/0.47                      Theta(max)= 39.890

R(reflections)= 0.0445( 1904)                      wR2(reflections)= wR= 0.0705( 2183)

S = 3.600                      Npar= 86

---

The following ALERTS were generated. Each ALERT has the format

**test-name\_ALERT\_alert-type\_alert-level.**

Click on the hyperlinks for more details of the test.

---

### Alert level A

GEOM001\_ALERT\_1\_A \_geom\_bond\_atom\_site\_label\_1 is missing  
Label identifying the atom site 1.  
GEOM003\_ALERT\_1\_A \_geom\_bond\_distance is missing  
Distance between atom sites 1 and 2.  
GEOM006\_ALERT\_1\_A \_geom\_angle\_atom\_site\_label\_2 is missing  
Label identifying the atom site 2.  
GEOM007\_ALERT\_1\_A \_geom\_angle\_atom\_site\_label\_3 is missing  
Label identifying the atom site 3.  
WEIGH01\_ALERT\_1\_A Unit weights are not acceptable for submissions to Acta  
Crystallographica Section C.  
n.b. unit is however a legal CIF keyword.

---

### Alert level B

|                   |                    |           |                                 |      |       |
|-------------------|--------------------|-----------|---------------------------------|------|-------|
| PLAT220_ALERT_2_B | Non-Solvent Resd 1 | Bi        | Ueq(max)/Ueq(min) Range         | 9.5  | Ratio |
| PLAT220_ALERT_2_B | Non-Solvent Resd 1 | O         | Ueq(max)/Ueq(min) Range         | 10.0 | Ratio |
| PLAT242_ALERT_2_B | Low                | 'MainMol' | Ueq as Compared to Neighbors of | P1   | Check |
| PLAT242_ALERT_2_B | Low                | 'MainMol' | Ueq as Compared to Neighbors of | O7   | Check |

---

### Alert level C

GOODF01\_ALERT\_2\_C The least squares goodness of fit parameter lies  
outside the range 0.80 <> 2.00  
Goodness of fit given = 3.600  
STRVA01\_ALERT\_4\_C Flack test results are ambiguous.  
From the CIF: \_refine\_ls\_abs\_structure\_Flack 0.480  
From the CIF: \_refine\_ls\_abs\_structure\_Flack\_su 0.080  
PLAT041\_ALERT\_1\_C Calc. and Reported SumFormula Strings Differ Please Check  
PLAT068\_ALERT\_1\_C Reported F000 Differs from Calcd (or Missing)... Please Check  
PLAT077\_ALERT\_4\_C Unitcell contains non-integer number of atoms .. Please Check  
PLAT127\_ALERT\_1\_C Implicit Hall Symbol Inconsistent with Explicit P 2x;2y;2z  
PLAT242\_ALERT\_2\_C Low 'MainMol' Ueq as Compared to Neighbors of P2 Check  
PLAT242\_ALERT\_2\_C Low 'MainMol' Ueq as Compared to Neighbors of O2B Check  
PLAT250\_ALERT\_2\_C Large U3/U1 Ratio for Average U(i,j) Tensor .... 3.3 Note

---

### Alert level G

|                   |                                                  |       |              |
|-------------------|--------------------------------------------------|-------|--------------|
| PLAT004_ALERT_5_G | Polymeric Structure Found with Maximum Dimension | 2     | Info         |
| PLAT005_ALERT_5_G | No Embedded Refinement Details found in the CIF  |       | Please Do !  |
| PLAT033_ALERT_4_G | Flack x Value Deviates > 3.0 * sigma from Zero . | 0.480 | Note         |
| PLAT045_ALERT_1_G | Calculated and Reported Z Differ by a Factor ... | 0.25  | Check        |
| PLAT128_ALERT_4_G | Alternate Setting for Input Space Group P2121    | P2121 | Note         |
| PLAT199_ALERT_1_G | Reported _cell_measurement_temperature ..... (K) | 293   | Check        |
| PLAT200_ALERT_1_G | Reported _diffrn_ambient_temperature ..... (K)   | 293   | Check        |
| PLAT301_ALERT_3_G | Main Residue Disorder ..... Percentage =         | 15    | Note         |
| PLAT720_ALERT_4_G | Number of Unusual/Non-Standard Labels .....      | 2     | Note         |
| PLAT791_ALERT_4_G | The Model has Chirality at P1 (Chiral SPGR)      | R     | Verify       |
| PLAT791_ALERT_4_G | The Model has Chirality at P2 (Chiral SPGR)      | R     | Verify       |
| PLAT804_ALERT_5_G | Number of ARU-Code Packing Problem(s) in PLATON  | 8     | Info         |
| PLAT808_ALERT_5_G | No Parseable SHELXL Style Weighting Scheme Found |       | Please Check |
| PLAT860_ALERT_3_G | Number of Least-Squares Restraints .....         | 11    | Note         |
| PLAT952_ALERT_5_G | Calculated (ThMax) and CIF-Reported Lmax Differ  | 3     | Units        |

---

5 **ALERT level A** = Most likely a serious problem - resolve or explain

4 **ALERT level B** = A potentially serious problem, consider carefully  
9 **ALERT level C** = Check. Ensure it is not caused by an omission or oversight  
15 **ALERT level G** = General information/check it is not something unexpected

11 ALERT type 1 CIF construction/syntax error, inconsistent or missing data  
8 ALERT type 2 Indicator that the structure model may be wrong or deficient  
2 ALERT type 3 Indicator that the structure quality may be low  
7 ALERT type 4 Improvement, methodology, query or suggestion  
5 ALERT type 5 Informative message, check

---

It is advisable to attempt to resolve as many as possible of the alerts in all categories. Often the minor alerts point to easily fixed oversights, errors and omissions in your CIF or refinement strategy, so attention to these fine details can be worthwhile. In order to resolve some of the more serious problems it may be necessary to carry out additional measurements or structure refinements. However, the purpose of your study may justify the reported deviations and the more serious of these should normally be commented upon in the discussion or experimental section of a paper or in the "special\_details" fields of the CIF. checkCIF was carefully designed to identify outliers and unusual parameters, but every test has its limitations and alerts that are not important in a particular case may appear. Conversely, the absence of alerts does not guarantee there are no aspects of the results needing attention. It is up to the individual to critically assess their own results and, if necessary, seek expert advice.

### **Publication of your CIF in IUCr journals**

A basic structural check has been run on your CIF. These basic checks will be run on all CIFs submitted for publication in IUCr journals (*Acta Crystallographica*, *Journal of Applied Crystallography*, *Journal of Synchrotron Radiation*); however, if you intend to submit to *Acta Crystallographica Section C* or *E* or *IUCrData*, you should make sure that full publication checks are run on the final version of your CIF prior to submission.

### **Publication of your CIF in other journals**

Please refer to the *Notes for Authors* of the relevant journal for any special instructions relating to CIF submission.

---

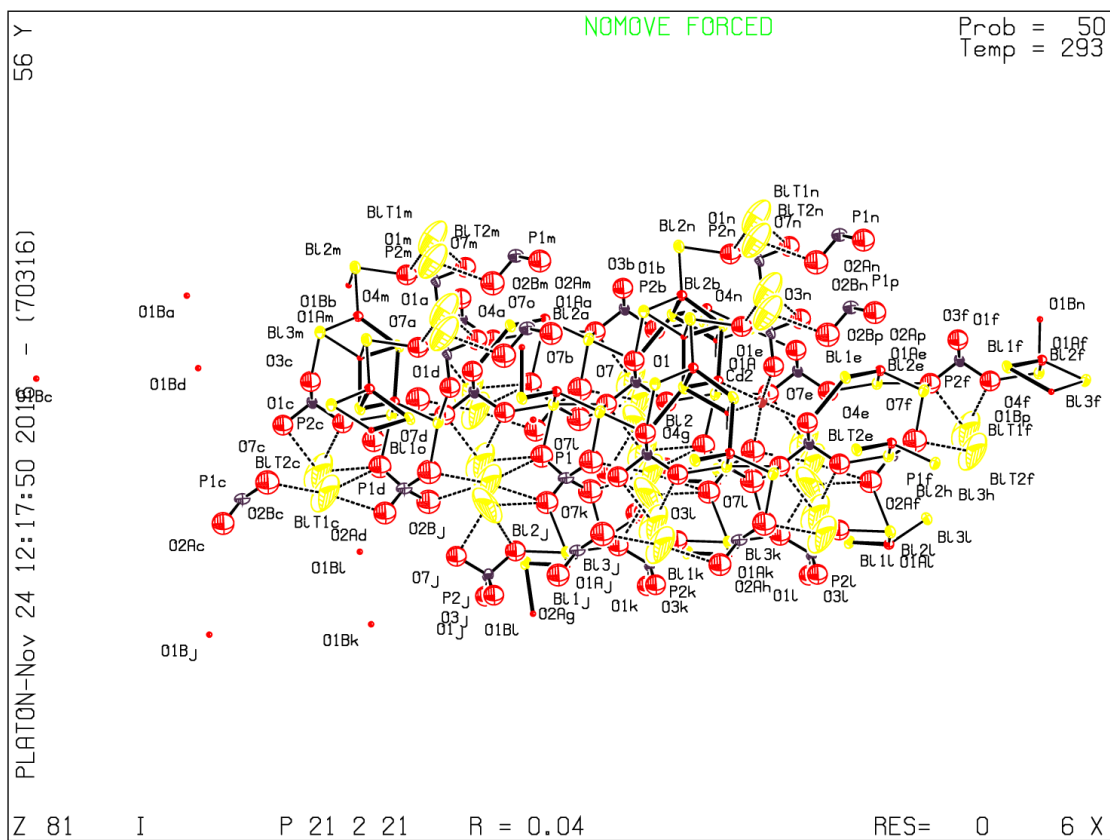

Supplement: c6ce02466a1.pdf [file c6ce02466a1.pdf]
