# Supplementary material for: Original oxo-centered bismuth oxo-arsenates; critical effect of PO4for AsO4substitution
Source: Royal Society of Chemistry journal article supplement (doi:10.1039/c6ce02466a), 2016-12-22

## checkCIF/PLATON report

You have not supplied any structure factors. As a result the full set of tests cannot be run.

THIS REPORT IS FOR GUIDANCE ONLY. IF USED AS PART OF A REVIEW PROCEDURE FOR PUBLICATION, IT SHOULD NOT REPLACE THE EXPERTISE OF AN EXPERIENCED CRYSTALLOGRAPHIC REFEREE.

No syntax errors found.      CIF dictionary      Interpreting this report

### Datablock: I

---

Bond precision:    Bi- O = 0.0243 Å      Wavelength=0.71073

Cell:                      a=5.537(2)              b=7.153(3)              c=19.372(7)  
                                alpha=90              beta=90              gamma=90  
Temperature:              293 K

|                        | Calculated                                                         | Reported                                                            |
|------------------------|--------------------------------------------------------------------|---------------------------------------------------------------------|
| Volume                 | 767.3(5)                                                           | 767.2(5)                                                            |
| Space group            | P 21 2 21                                                          | P 21 2 21                                                           |
| Hall group             | P 2ac 2ac                                                          | P 2x <sup>ac</sup> ;2y;2                                            |
| Moiety formula         | As <sub>6</sub> Bi <sub>7.33</sub> Cd <sub>6</sub> O <sub>32</sub> | ?                                                                   |
| Sum formula            | As <sub>6</sub> Bi <sub>7.33</sub> Cd <sub>6</sub> O <sub>32</sub> | As <sub>3</sub> Bi <sub>3.667</sub> Cd <sub>3</sub> O <sub>16</sub> |
| Mr                     | 3168.51                                                            | 1584.30                                                             |
| Dx,g cm <sup>-3</sup>  | 6.857                                                              | 6.858                                                               |
| Z                      | 1                                                                  | 2                                                                   |
| Mu (mm <sup>-1</sup> ) | 52.475                                                             | 52.485                                                              |
| F000                   | 1350.7                                                             | 1351.0                                                              |
| F000'                  | 1319.28                                                            |                                                                     |
| h,k,lmax               | 9,12,34                                                            | 9,12,34                                                             |
| Nref                   | 4609[ 2650]                                                        | 2209                                                                |
| Tmin,Tmax              | 0.001,0.207                                                        | 0.250,0.700                                                         |
| Tmin'                  | 0.000                                                              |                                                                     |

Correction method= # Reported T Limits: Tmin=0.250 Tmax=0.700  
AbsCorr = MULTI-SCAN

Data completeness= 0.83/0.48      Theta(max)= 39.480

R(reflections)= 0.0322( 1858)      wR2(reflections)= wR= 0.0535( 2209)

S = 2.850      Npar= 81

---

The following ALERTS were generated. Each ALERT has the format

**test-name\_ALERT\_alert-type\_alert-level.**

Click on the hyperlinks for more details of the test.

---

### Alert level A

WEIGH01\_ALERT\_1\_A Unit weights are not acceptable for submissions to Acta Crystallographica Section C.

n.b. unit is however a legal CIF keyword.

---

### Alert level C

GOODF01\_ALERT\_2\_C The least squares goodness of fit parameter lies outside the range 0.80 <> 2.00

Goodness of fit given = 2.850

STRVA01\_ALERT\_4\_C Flack test results are ambiguous.

From the CIF: `_refine_ls_abs_structure_Flack` 0.480

From the CIF: `_refine_ls_abs_structure_Flack_su` 0.050

|                   |                                                |                             |                                         |
|-------------------|------------------------------------------------|-----------------------------|-----------------------------------------|
| PLAT041_ALERT_1_C | Calc. and Reported SumFormula                  | Strings Differ              | Please Check                            |
| PLAT077_ALERT_4_C | Unitcell contains non-integer number of atoms  | ..                          | Please Check                            |
| PLAT127_ALERT_1_C | Implicit Hall Symbol                           | Inconsistent with Explicit  | P 2x <sup>ac</sup> ;2y;2z <sup>ac</sup> |
| PLAT220_ALERT_2_C | Non-Solvent Resd                               | 1 O Ueq(max)/Ueq(min) Range | 5.1 Ratio                               |
| PLAT241_ALERT_2_C | High 'MainMol' Ueq as Compared to Neighbors of |                             | 04 Check                                |
| PLAT241_ALERT_2_C | High 'MainMol' Ueq as Compared to Neighbors of |                             | 08 Check                                |
| PLAT242_ALERT_2_C | Low 'MainMol' Ueq as Compared to Neighbors of  |                             | Cd2 Check                               |
| PLAT242_ALERT_2_C | Low 'MainMol' Ueq as Compared to Neighbors of  |                             | As1 Check                               |

---

### Alert level G

|                   |                                                               |        |              |
|-------------------|---------------------------------------------------------------|--------|--------------|
| PLAT004_ALERT_5_G | Polymeric Structure Found with Maximum Dimension              | 3      | Info         |
| PLAT005_ALERT_5_G | No Embedded Refinement Details found in the CIF               |        | Please Do !  |
| PLAT033_ALERT_4_G | Flack x Value Deviates > 3.0 * sigma from Zero                | 0.480  | Note         |
| PLAT045_ALERT_1_G | Calculated and Reported Z Differ by a Factor ...              | 0.50   | Check        |
| PLAT068_ALERT_1_G | Reported F000 Differs from Calcd (or Missing)...              |        | Please Check |
| PLAT128_ALERT_4_G | Alternate Setting for Input Space Group P21221                | P21212 | Note         |
| PLAT199_ALERT_1_G | Reported <code>_cell_measurement_temperature</code> ..... (K) | 293    | Check        |
| PLAT200_ALERT_1_G | Reported <code>_diffrn_ambient_temperature</code> ..... (K)   | 293    | Check        |
| PLAT300_ALERT_4_G | Atom Site Occupancy of >BiT is Constrained at                 | 0.6667 | Check        |
| PLAT300_ALERT_4_G | Atom Site Occupancy of *Bi3 is Constrained at                 | 0.5    | Check        |
| PLAT300_ALERT_4_G | Atom Site Occupancy of *Cd3 is Constrained at                 | 0.5    | Check        |
| PLAT301_ALERT_3_G | Main Residue Disorder ..... Percentage =                      | 9      | Note         |
| PLAT720_ALERT_4_G | Number of Unusual/Non-Standard Labels .....                   | 1      | Note         |
| PLAT808_ALERT_5_G | No Parseable SHELXL Style Weighting Scheme Found              |        | Please Check |
| PLAT860_ALERT_3_G | Number of Least-Squares Restraints .....                      | 4      | Note         |

- 
- 1 **ALERT level A** = Most likely a serious problem - resolve or explain  
0 **ALERT level B** = A potentially serious problem, consider carefully  
10 **ALERT level C** = Check. Ensure it is not caused by an omission or oversight  
15 **ALERT level G** = General information/check it is not something unexpected

- 7 ALERT type 1 CIF construction/syntax error, inconsistent or missing data  
6 ALERT type 2 Indicator that the structure model may be wrong or deficient  
2 ALERT type 3 Indicator that the structure quality may be low  
8 ALERT type 4 Improvement, methodology, query or suggestion  
3 ALERT type 5 Informative message, check
-

It is advisable to attempt to resolve as many as possible of the alerts in all categories. Often the minor alerts point to easily fixed oversights, errors and omissions in your CIF or refinement strategy, so attention to these fine details can be worthwhile. In order to resolve some of the more serious problems it may be necessary to carry out additional measurements or structure refinements. However, the purpose of your study may justify the reported deviations and the more serious of these should normally be commented upon in the discussion or experimental section of a paper or in the "special\_details" fields of the CIF. checkCIF was carefully designed to identify outliers and unusual parameters, but every test has its limitations and alerts that are not important in a particular case may appear. Conversely, the absence of alerts does not guarantee there are no aspects of the results needing attention. It is up to the individual to critically assess their own results and, if necessary, seek expert advice.

### **Publication of your CIF in IUCr journals**

A basic structural check has been run on your CIF. These basic checks will be run on all CIFs submitted for publication in IUCr journals (*Acta Crystallographica*, *Journal of Applied Crystallography*, *Journal of Synchrotron Radiation*); however, if you intend to submit to *Acta Crystallographica Section C* or *E* or *IUCrData*, you should make sure that full publication checks are run on the final version of your CIF prior to submission.

### **Publication of your CIF in other journals**

Please refer to the *Notes for Authors* of the relevant journal for any special instructions relating to CIF submission.

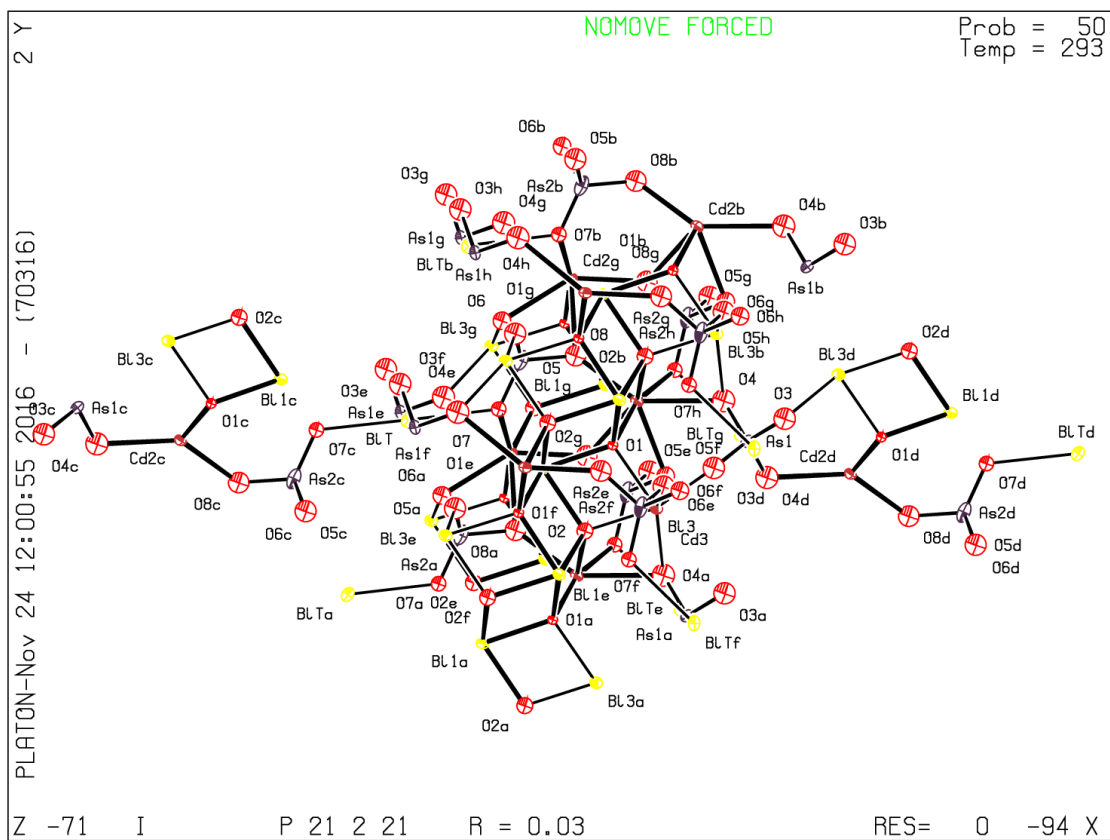

Supplement: c6ce02466a2.pdf [file c6ce02466a2.pdf]
